# Supplementary material
Source: bioRxiv or medRxiv preprint supplement (https://medrxiv.org/highwire/filestream/96656/field_highwire_adjunct_files/0/2020.09.12.20193284-1.pdf)
Supplement: Supplementary file [file 2020.09.12.20193284-1.pdf]

Supplementary figures and tables for  
“Estimates of outbreak-specific SARS-CoV-2  
epidemiological parameters from genomic data”

Timothy G. Vaughan, Jérémie Sciré, Sarah A. Nadeau and Tanja Stadler

Table S1: Sequence information.

| Outbreak            | No. sequences | Date of last sequence | Limiting public health intervention                      |
|---------------------|---------------|-----------------------|----------------------------------------------------------|
| Australia           | 9             | Mar. 11               | Mar. 21 nationwide social distancing begins              |
| China               | 13            | Jan. 23               | Jan. 23 Wuhan quarantined                                |
| The Netherlands (1) | 35            | Mar. 12               | Mar. 12 schools close, large gatherings banned           |
| The Netherlands (2) | 51            | Mar. 12               | ”                                                        |
| France (1)          | 31            | Mar. 16               | Mar. 16 nationwide lockdown                              |
| France (2)          | 19            | Mar. 16               | ”                                                        |
| Iceland (1)         | 47            | Mar. 18               | Mar. 16 secondary schools close, large gatherings banned |
| Iceland (2)         | 17            | Mar. 18               | ”                                                        |
| Italy               | 55            | Mar. 8                | Mar. 8 Lombardy lockdown                                 |
| Spain               | 14            | Mar. 12               | Mar. 11 schools close in Madrid                          |
| WA State (USA) (1)  | 217           | Mar. 11               | Mar. 11 large gatherings banned                          |
| WA State (USA) (2)  | 9             | Mar. 11               | ”                                                        |
| Iran                | 14            | Mar. 4                | Feb. 22 schools close, large gatherings banned           |
| Wales               | 47            | Mar. 16               | Mar. 20 schools close                                    |
| Diamond Princess    | 96            | Feb. 25               | Feb. 4 ship quarantined                                  |

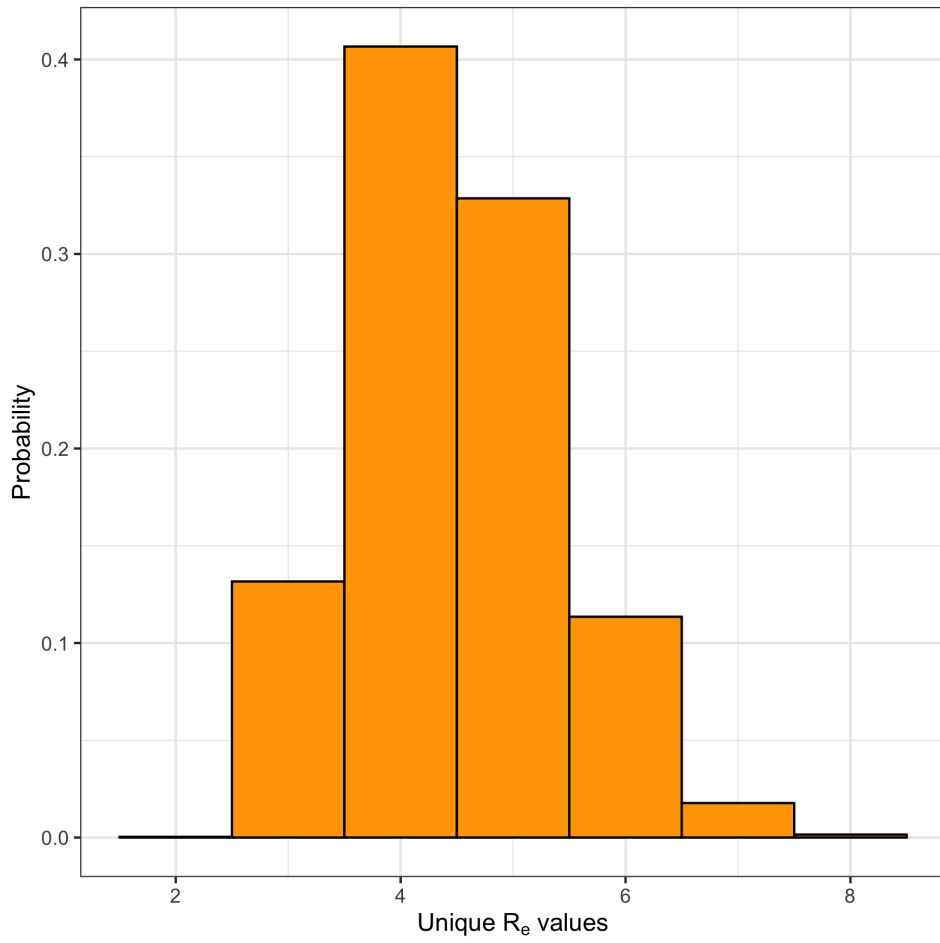

Figure S1: Posterior for the number of unique  $R_0$  values among the 15 distinct outbreaks considered, given by Bayesian model averaging. (Only the value prior to the quarantine aboard the Diamond Princess was included in this averaging.)

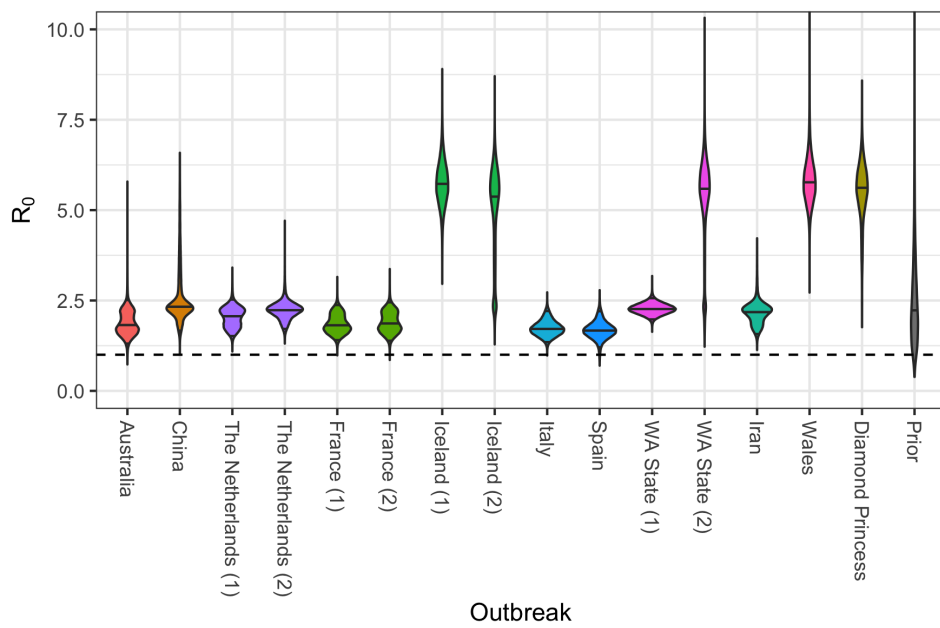

Figure S2: Comparison of  $R_0$  posterior distributions estimated using Bayesian model averaging. (Only the value prior to the quarantine aboard the Diamond Princess was included in this averaging.)

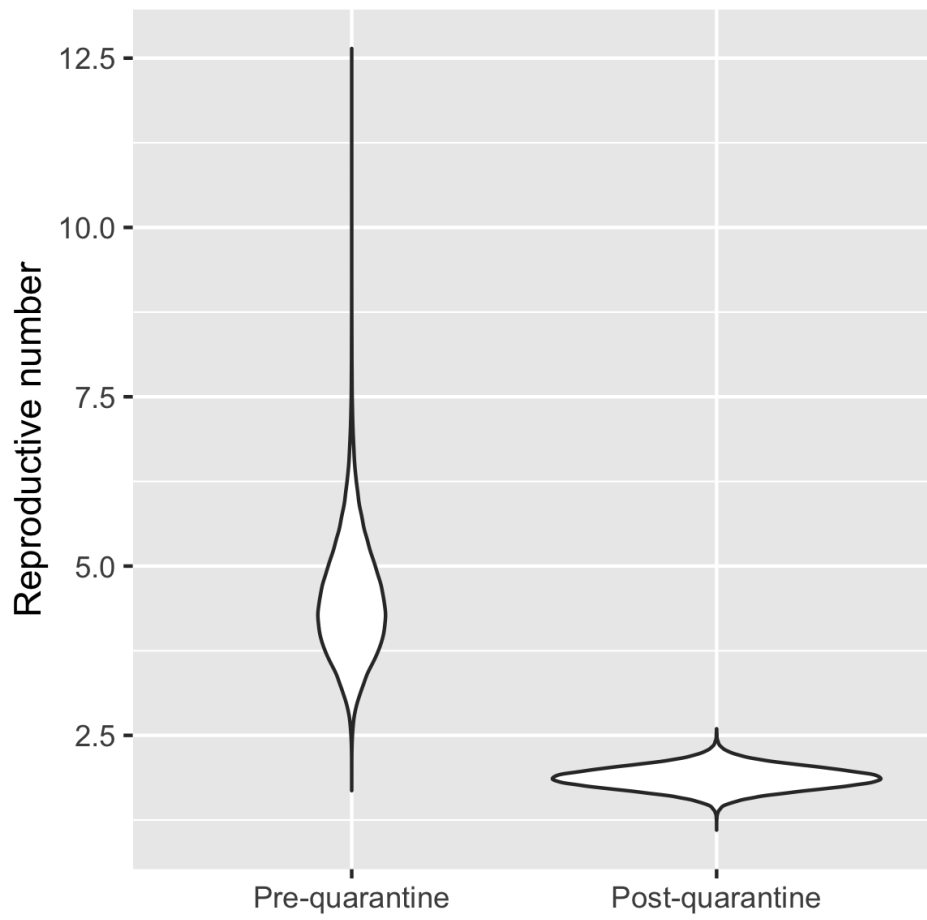

Figure S3: Comparison of  $R_0$  posterior distributions estimated for the pre- and post-quarantine phases of the Diamond Princess outbreak.

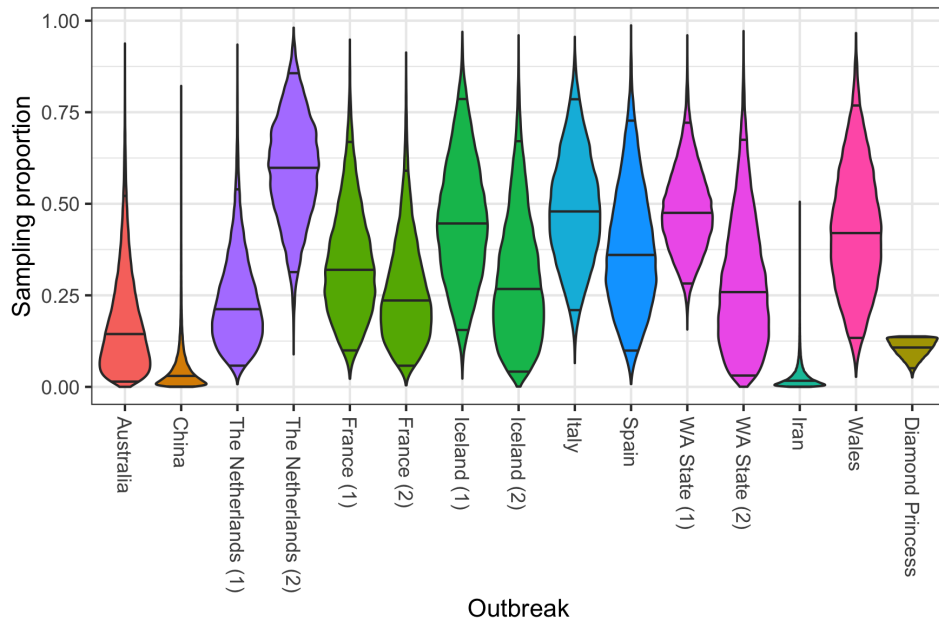

Figure S4: Inferred sampling proportions corresponding to the outbreaks analyzed. Non-informative priors were used for all sampling proportions except for the one corresponding to the Diamond Princess. (See methods).

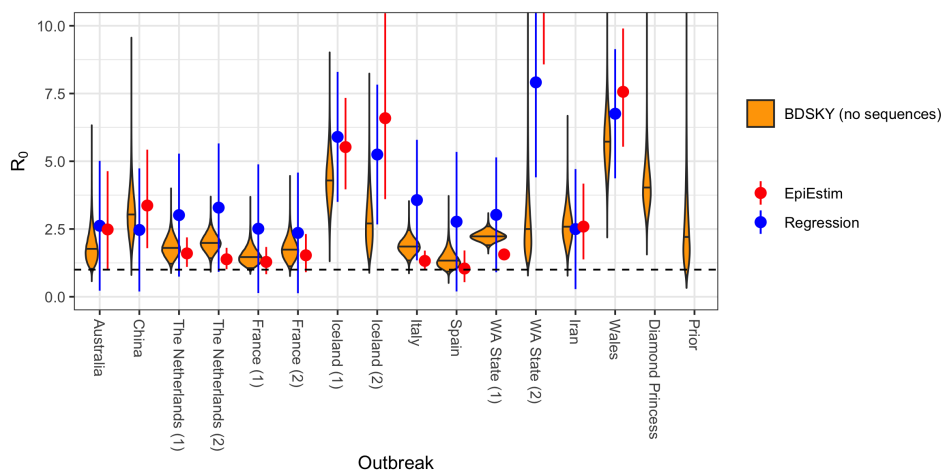

Figure S5:  $R_0$  values inferred using (a) phylodynamic method without sequence data, (b) EpiEstim (1) analysis of sequenced sample collection times, and (c) linear regression of outbreak-specific cumulative sample count distributions. (The Diamond Princess regression and EpiEstim results have been excluded from this graphic, as they relate to the post- rather than pre-quarantine phase of that outbreak.)

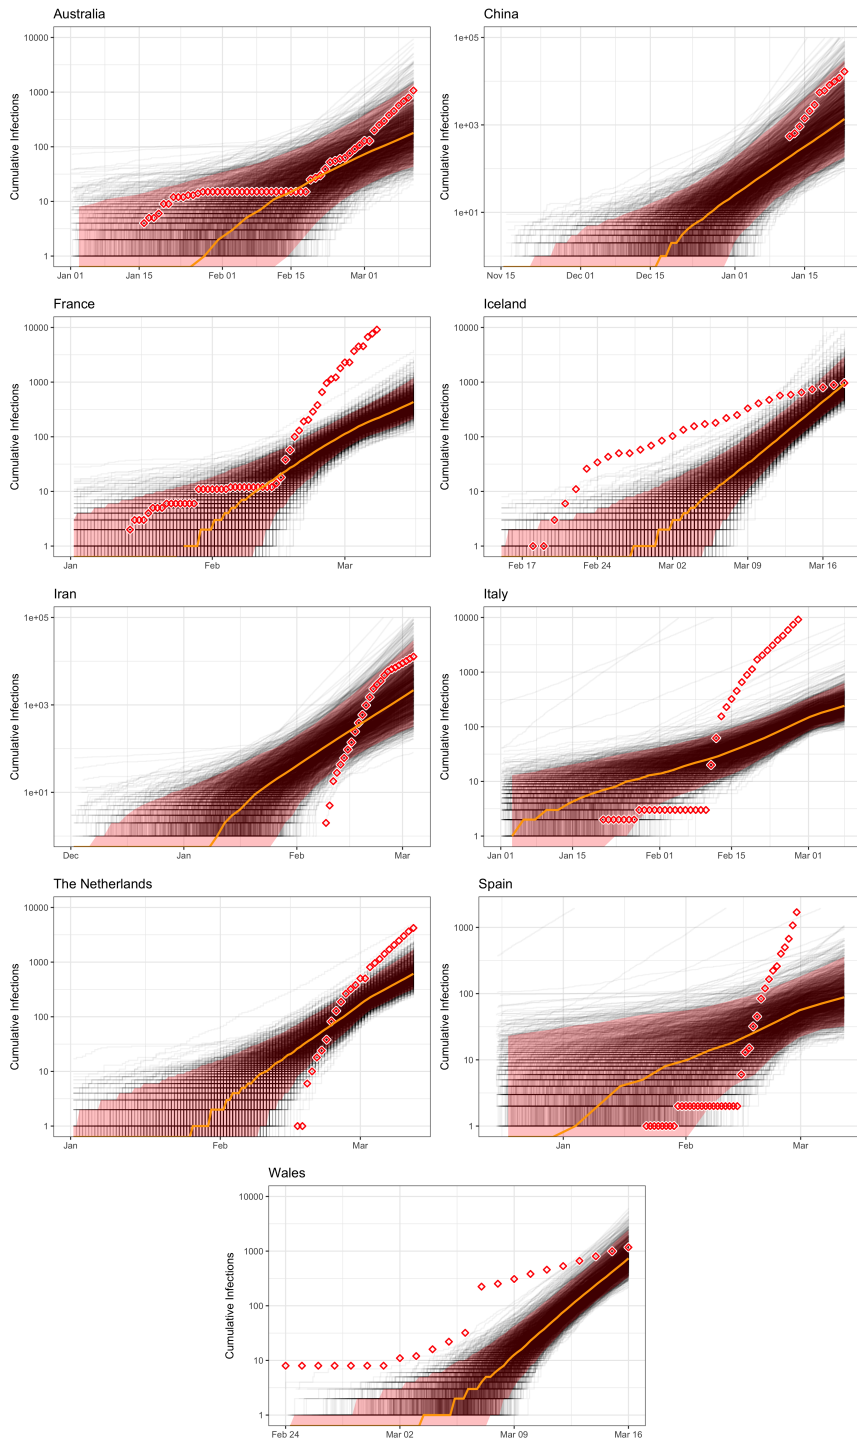

Figure S6: Inferred cumulative case trajectories for remaining outbreaks.

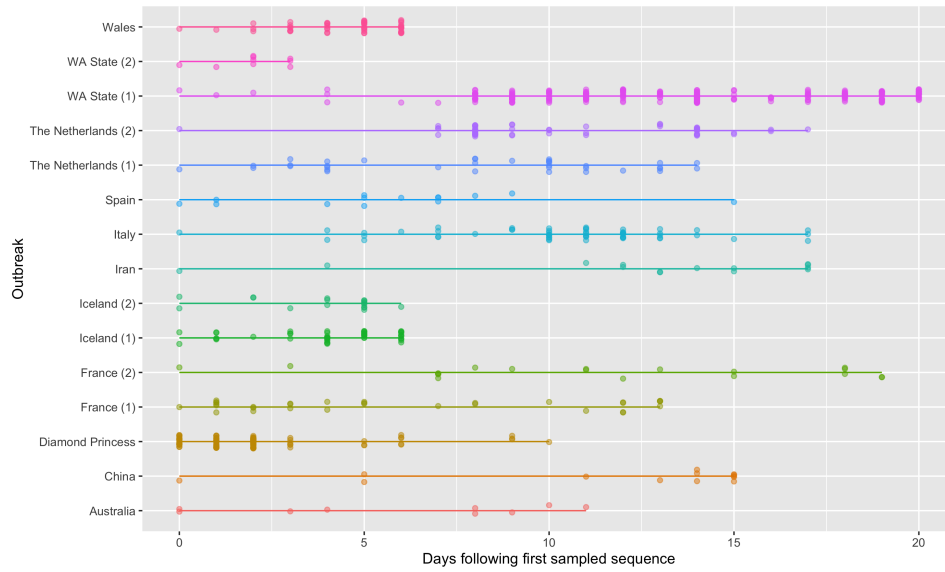

Figure S7: Sample times relative to first sample from each outbreak. Horizontal bars represent full sample period lengths.

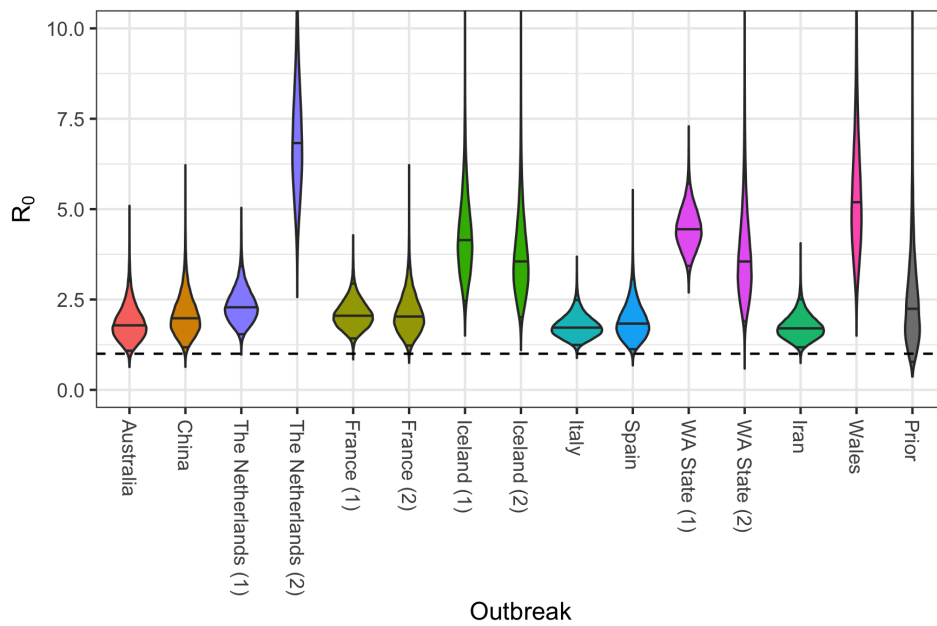

Figure S8: Estimates of  $R_0$  produced using alternative model in which a change in  $R_0$  and the sampling proportion  $s$  is permitted at a point midway between the first and last samples of each outbreak. The posteriors shown are for the  $R_0$  values in the earlier of the two intervals.

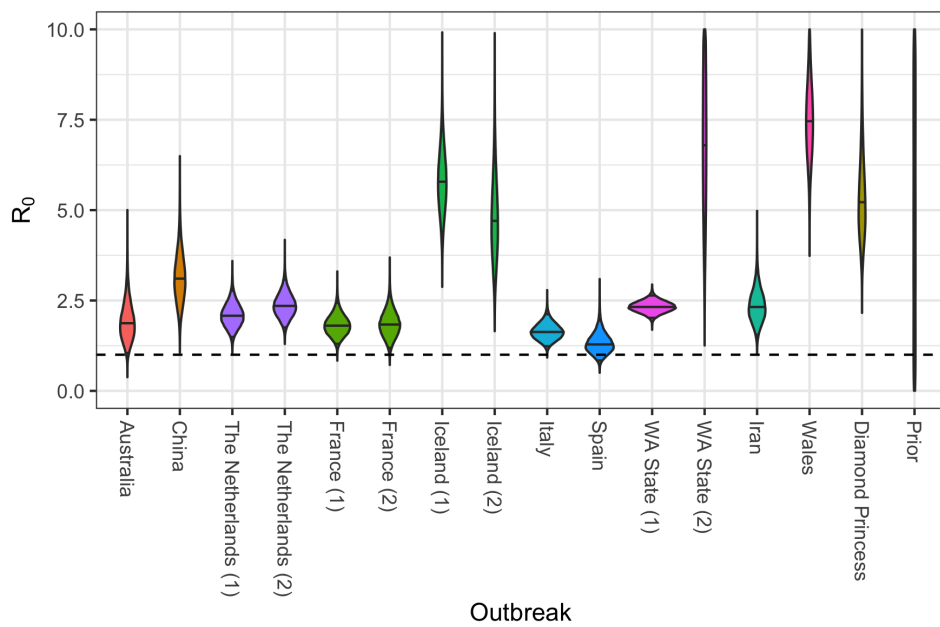

Figure S9: Estimates of  $R_0$  produced using the alternative prior  $\text{Unif}(0, 10)$ , illustrating the insensitivity of the results to the precise prior used.



## References

- [1] A. Cori, N. M. Ferguson, C. Fraser, and S. Cauchemez. A new framework and software to estimate time-varying reproduction numbers during epidemics. *American Journal of Epidemiology*, 178(9):1505–1512, sep 2013. doi: 10.1093/aje/kwt133.
